# Supplementary material for: A highly selective phosphorescence probe for histidine in living bodies
Source: Royal Society of Chemistry journal article supplement (doi:10.1039/c5dt03319e), 2015-01-01
Supplement: c5dt03319e1.pdf [file c5dt03319e1.pdf]

## **Electronic Supplementary Information for**

### **A Highly Selective Phosphorescence Probe for Histidine in Living Bodies**

Quankun Gao, Bo Song, Zhiqiang Ye,\* Liu Yang, Ruoyang Liu, Jingli Yuan

State Key Laboratory of Fine Chemicals, Department of Chemistry, Dalian University of Technology, Dalian 116024, China

\*Corresponding author

Tel./Fax: +86-411-84986042;

E-mail: yezq@dlut.edu.cn

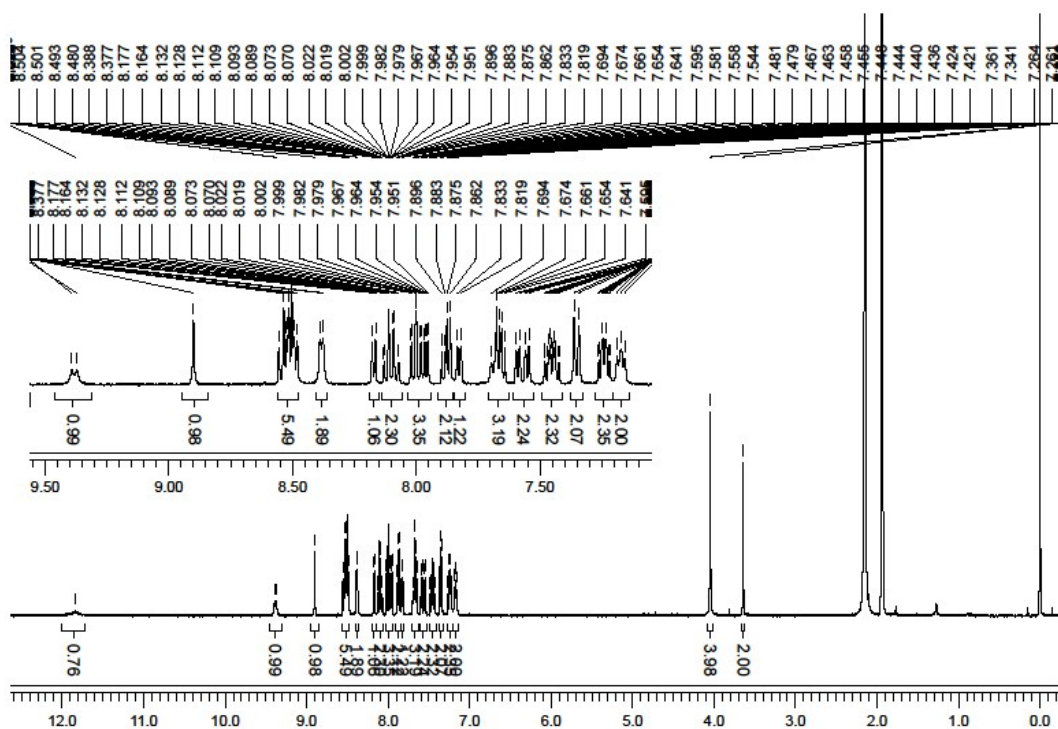

Figure S1.  $^1\text{H}$  NMR of  $[\text{Ru}(\text{bpy})_2(\text{phen-DPA})](\text{PF}_6)_2$  ( $\text{CD}_3\text{CN}$ , 400MHz).

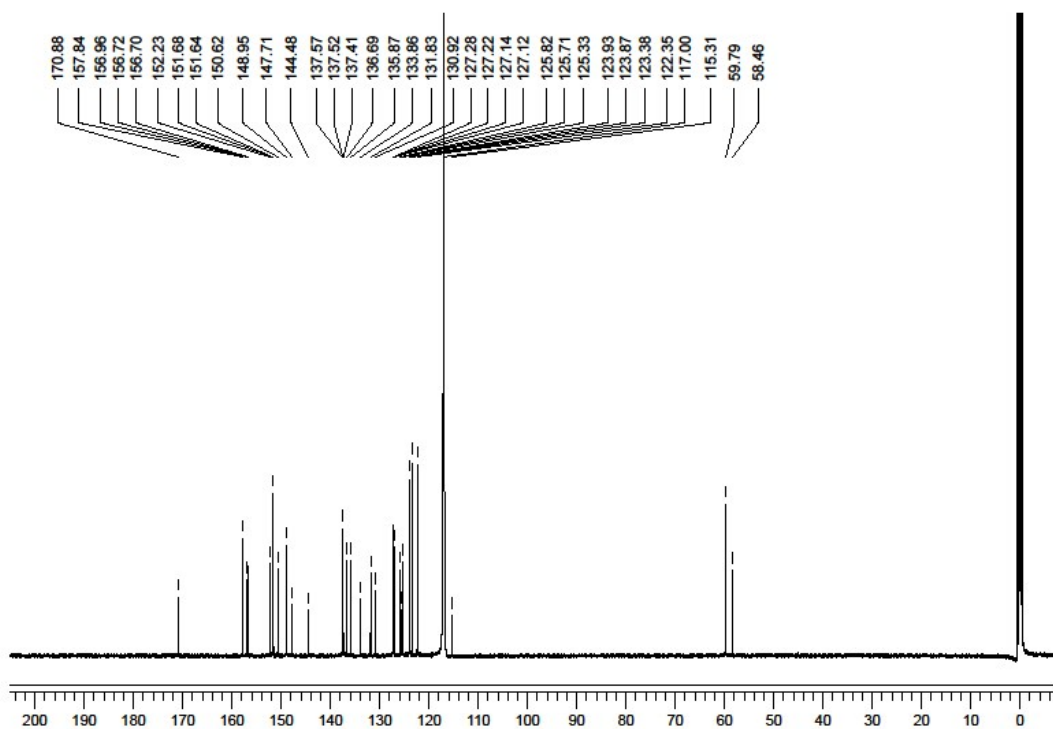

Figure S2.  $^{13}\text{C}$  NMR of  $[\text{Ru}(\text{bpy})_2(\text{phen-DPA})](\text{PF}_6)_2$  ( $\text{CD}_3\text{CN}$ , 100MHz).

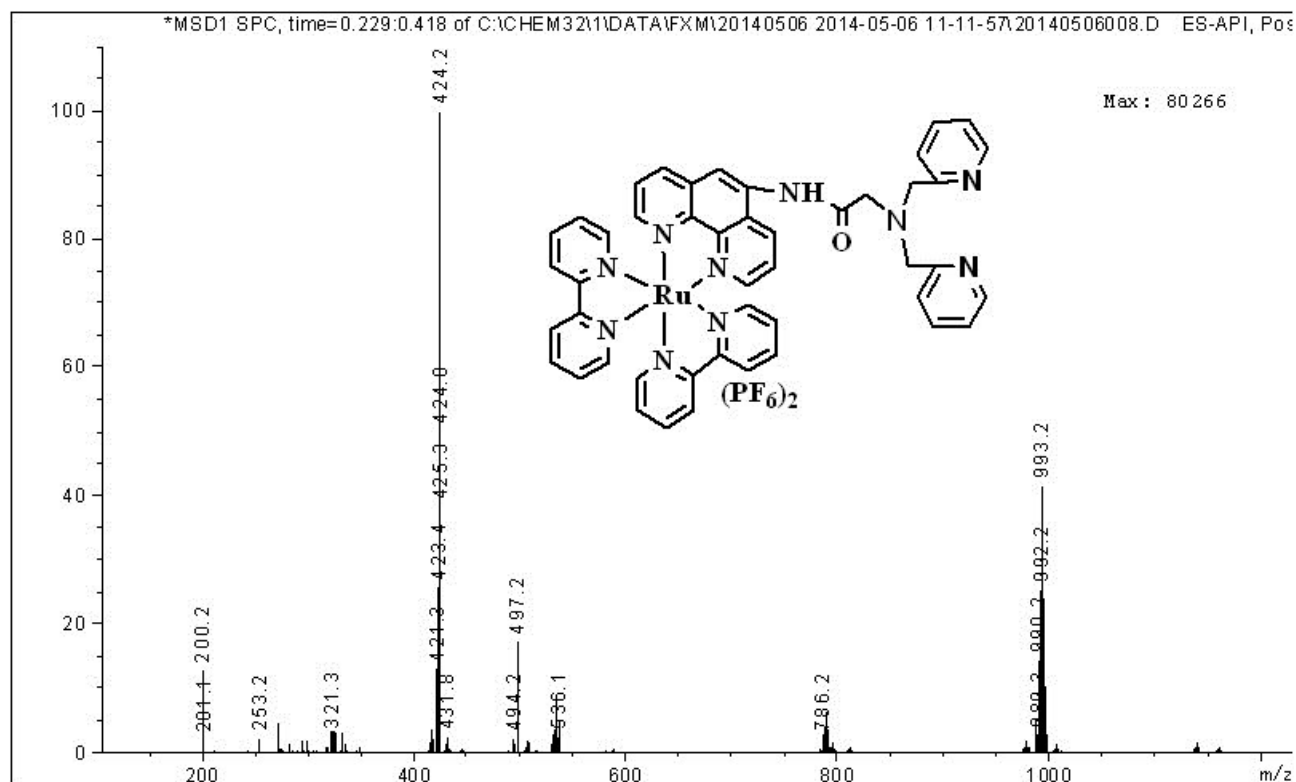

Figure S3. ESI-MS of  $[\text{Ru}(\text{bpy})_2(\text{phen-DPA})](\text{PF}_6)_2$ .

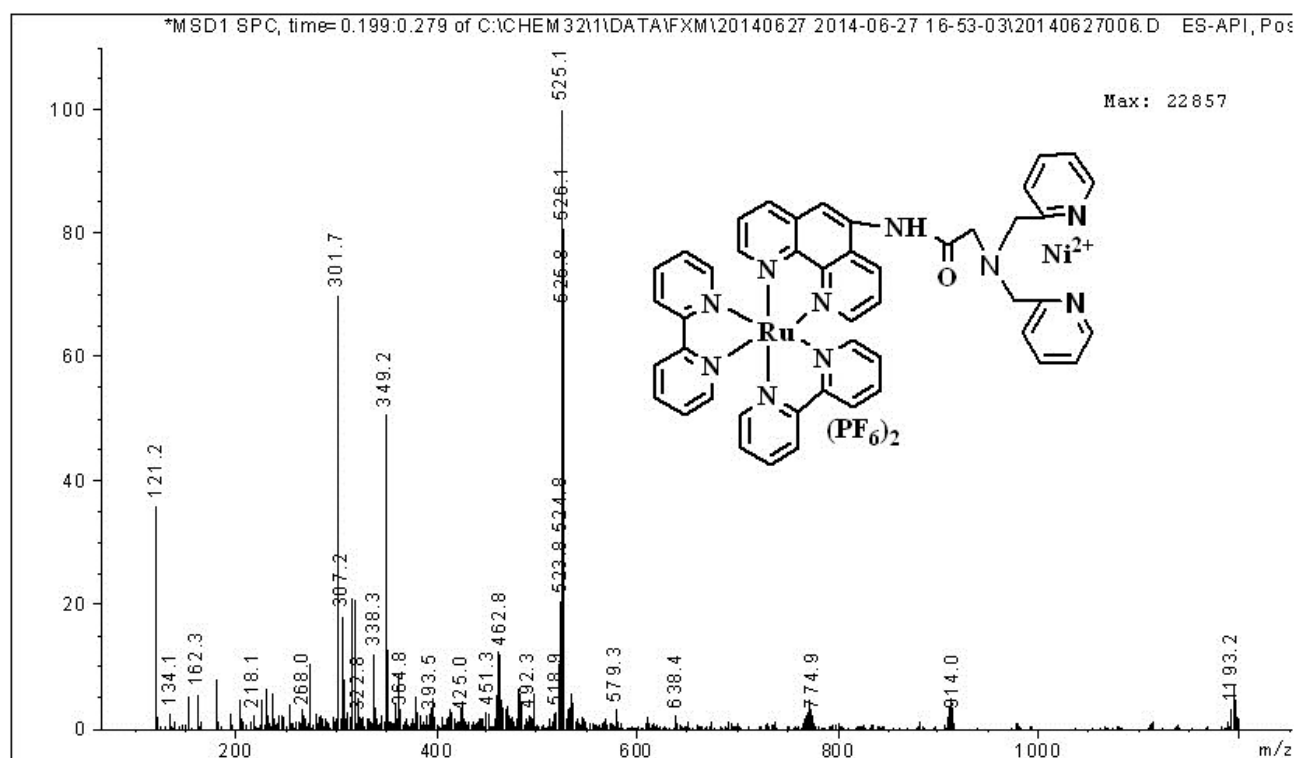

Figure S4. ESI-MS of Ru-Ni.

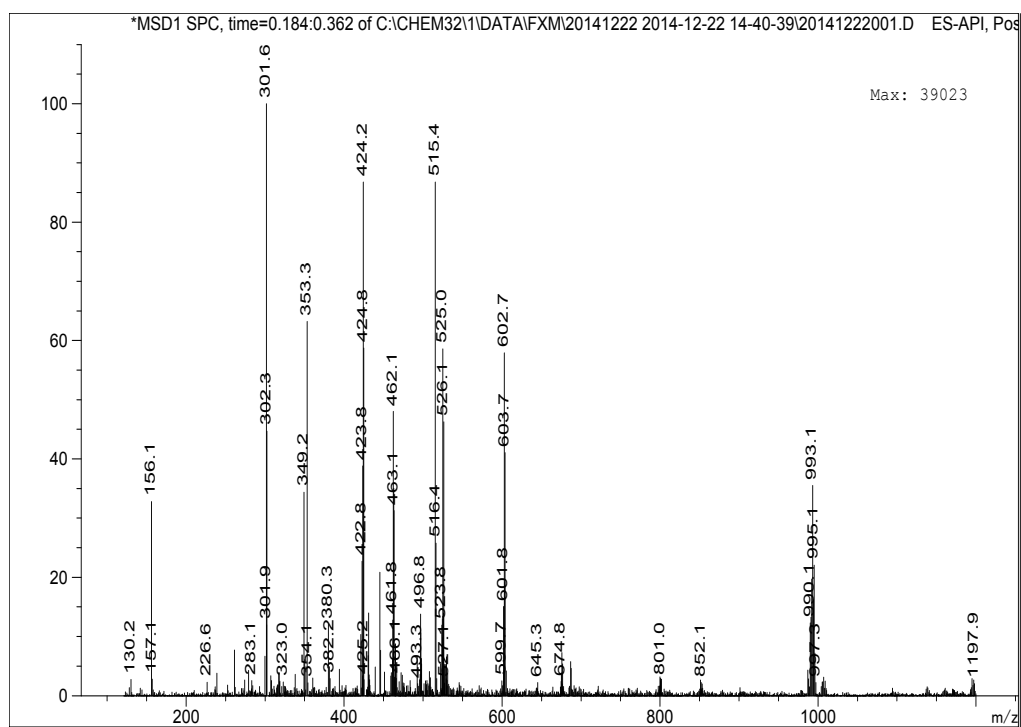

**Figure S5.** ESI-MS of the product of **Ru-Ni** reacted with Histidine.

**Table S1.** Photophysical parameters of the Ru complexes<sup>[a]</sup>.

| complex                                                          | $\lambda_{\text{ex,max}}$<br>(nm) | $\epsilon_{450}$ ( $\text{cm}^{-1}\text{M}^{-1}$ ) | $\lambda_{\text{em,max}}$<br>(nm) | $\phi$ (%) | $\tau$ (ns) <sup>[b]</sup> |
|------------------------------------------------------------------|-----------------------------------|----------------------------------------------------|-----------------------------------|------------|----------------------------|
| [Ru(bpy) <sub>2</sub> (phen-DPA)](PF <sub>6</sub> ) <sub>2</sub> | 450                               | $1.64 \times 10^4$                                 | 603                               | 4.17       | 683                        |
| <b>Ru-Ni</b>                                                     | 450                               | $1.77 \times 10^4$                                 | 603                               | 0.35       | 655                        |

[a] All data were obtained in EtOH/HEPES buffer (50 mM, pH 7.2, 2 : 3, v/v). [b] Phosphorescence lifetime, measured with the phosphorescence method.

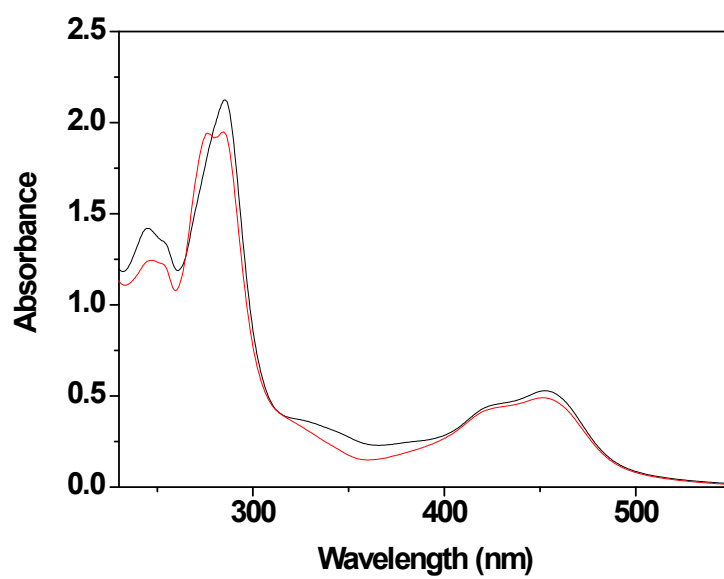

**Figure S6.** UV/Vis absorption spectra of the Ru complexes (30  $\mu$ M) in EtOH/HEPES buffer (50 mM, pH 7.2, 2 : 3, v/v). [Ru(bpy)<sub>2</sub>(phen-DPA)](PF<sub>6</sub>)<sub>2</sub>: black line; **Ru-Ni**: red line

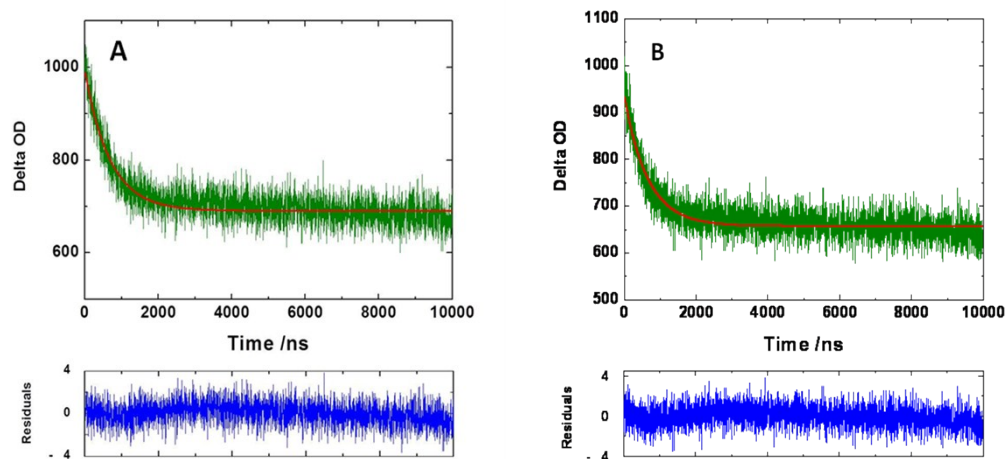

**Figure S7.** Decay traces of the Ru(II) complexes solutions. (A)  $[\text{Ru}(\text{bpy})_2(\text{phen-DPA})](\text{PF}_6)_2$ ; (B)

**Ru-Ni**

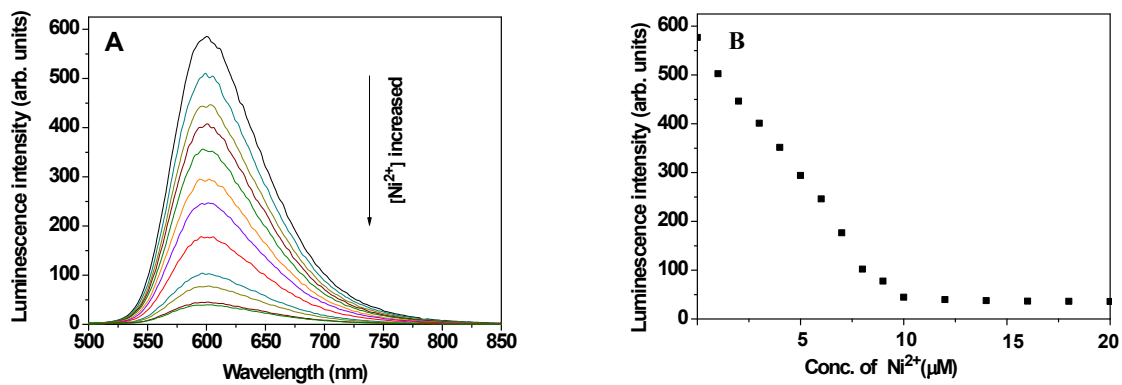

**Figure S8.** (A) Emission spectra of  $[\text{Ru}(\text{bpy})_2(\text{phen-DPA})](\text{PF}_6)_2$  ( $10 \mu\text{M}$ ) in the presence of different concentrations of  $\text{Ni}^{2+}$  in EtOH/HEPES buffer ( $50 \text{ mM}$ ,  $\text{pH } 7.2$ ,  $2 : 3$ , v/v) ( $\text{Ni}^{2+}$  concentrations:  $0.0$ ,  $1.0$ ,  $2.0$ ,  $3.0$ ,  $4.0$ ,  $5.0$ ,  $6.0$ ,  $7.0$ ,  $8.0$ ,  $9.0$ ,  $10$  and  $12 \mu\text{M}$ ). (B) The change in luminescence intensity of  $[\text{Ru}(\text{bpy})_2(\text{phen-DPA})](\text{PF}_6)_2$  at  $603 \text{ nm}$  in the presence of different concentrations of  $\text{Ni}^{2+}$  ( $0$ - $20 \mu\text{M}$ ). Excitation wavelength:  $450 \text{ nm}$ .



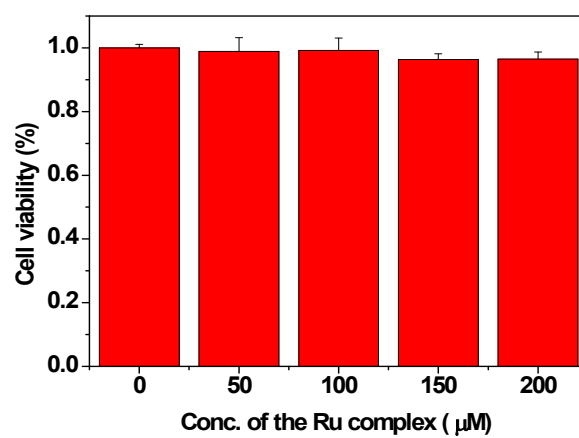

**Figure S9.** Viabilities of the HeLa cells after incubated with different concentrations of **Ru-Ni** for 3 h.
